# Supplementary material for: Characterization of cephalic and non-cephalic sensory cell types provides insight into joint photo- and mechanoreceptor evolution
Source: PubMed Central journal article supplement (PMC8367381; doi:10.7554/elife.66144), 2021-08-05
Supplement: elife-66144-fig3-data1.pdf [file elife-66144-fig3-data1.pdf]

|                 | <i>P. dumerilii</i><br>Gene ID | <i>D. melanogaster</i><br>Gene Symbol | BLAST<br>E value |
|-----------------|--------------------------------|---------------------------------------|------------------|
| EP-SPECIFIC     | <i>c2720</i>                   | <i>gai</i>                            | 1e-165           |
|                 | <i>c680</i>                    | <i>dnc</i>                            | 0                |
|                 | <i>c8760</i>                   | <i>cg3501</i>                         | 2e-40            |
|                 | <i>c10874</i>                  | <i>numb</i>                           | 5e-117           |
|                 | <i>c9898</i>                   | <i>ipp</i>                            | 2e-75            |
| COMMON EP / TRE | <i>c8120</i>                   | <i>inac</i>                           | 0                |
|                 | <i>c10788</i>                  | <i>trp/trpl</i>                       | 6e-129/1e-142    |
|                 | <i>c10763</i>                  | <i>gβ76c</i>                          | 2e-101           |
|                 | <i>c3283</i>                   | <i>rh2</i>                            | 6e-62            |
|                 | <i>c10800</i>                  | <i>norpa</i>                          | 1e-129           |
|                 | <i>c6424</i>                   | <i>gaq/cg30054/cta</i>                | 0/7e-156/2e-78   |
|                 | <i>c10413</i>                  | <i>hook</i>                           | 4e-107           |
|                 | <i>c10969</i>                  | <i>cg5027</i>                         | 3e-48            |
|                 | <i>c8541</i>                   | <i>psn</i>                            | 1e-104           |
|                 | <i>c10958</i>                  | <i>rapgap1</i>                        | 4e-157           |
| TRE-SPECIFIC    | <i>c4259</i>                   | <i>ds/cad99C</i>                      | 1e-91/1e-52      |
|                 | <i>c9464</i>                   | <i>cg3887</i>                         | 2e-44            |
|                 | <i>c10745</i>                  | <i>cg5168</i>                         | 1e-164           |
|                 | <i>c2053</i>                   | <i>gl</i>                             | 1e-70            |
|                 | <i>c11125</i>                  | <i>cg11880</i>                        | 8e-49            |
|                 | <i>c14153</i>                  | <i>cg7149</i>                         | 2e-99            |
|                 | <i>c19480</i>                  | <i>cg3356</i>                         | 5e-46            |
|                 | <i>c7820</i>                   | <i>ap1sigma</i>                       | 3e-98            |

Figure 3- source data 1
