# Supplementary material for: Characterization of cephalic and non-cephalic sensory cell types provides insight into joint photo- and mechanoreceptor evolution
Source: PubMed Central journal article supplement (PMC8367381; doi:10.7554/elife.66144), 2021-08-05
Supplement: elife-66144-fig3-data2.pdf [file elife-66144-fig3-data2.pdf]

| <i>P. dumerilii</i><br>Gene ID | <i>D. melanogaster</i><br>Gene Symbol | BLAST<br>E value |
|--------------------------------|---------------------------------------|------------------|
|--------------------------------|---------------------------------------|------------------|

**EP-SPECIFIC**

|               |                     |                   |
|---------------|---------------------|-------------------|
| <i>c19864</i> | <i>Ano1</i>         | 4e-22             |
| <i>c6662</i>  | <i>Grin2a/b/d</i>   | 2e-42/4e-44/3e-43 |
| <i>c11624</i> | <i>Cdh23/Pcdh15</i> | 2e-157/2e-52      |
| <i>c1216</i>  | <i>Chrna10</i>      | 2e-56             |
| <i>c15086</i> | <i>Lrig1</i>        | 1e-21             |
| <i>c29499</i> | <i>Tub</i>          | 6e-152            |
| <i>c36304</i> | <i>Slc12a2</i>      | 4e-41             |
| <i>c7424</i>  | <i>Atp2b2</i>       | 0                 |
| <i>c10941</i> | <i>Gabrb2/3</i>     | 2e-74/1e-75       |
| <i>C7778</i>  | <i>Atp6v1b1</i>     | 5e-108            |

**COMMON EP / TRE**

|               |                      |                 |
|---------------|----------------------|-----------------|
| <i>c10559</i> | <i>Rab3a</i>         | 1e-121          |
| <i>c19136</i> | <i>Sod2</i>          | 1e-85           |
| <i>c10364</i> | <i>Wdr1</i>          | 7e-134          |
| <i>c10709</i> | <i>Tbl1x</i>         | 0               |
| <i>c10848</i> | <i>Clic5</i>         | 6e-30           |
| <i>c10850</i> | <i>Sptbn4</i>        | 3e-98           |
| <i>c10955</i> | <i>Kcnma1</i>        | 0               |
| <i>c1540</i>  | <i>Map1a</i>         | 8e-83           |
| <i>c30248</i> | <i>Rpl38</i>         | 9e-24           |
| <i>c3250</i>  | <i>Atp6v0a4</i>      | 0               |
| <i>c34334</i> | <i>Homer2</i>        | 1e-91           |
| <i>C4259</i>  | <i>Cdh1</i>          | 1e-21           |
| <i>c6138</i>  | <i>Fgfr1/Fyn/Kit</i> | 6e-54/0/1e-34   |
| <i>c6400</i>  | <i>Casp3</i>         | 5e-70           |
| <i>c9994</i>  | <i>Sod1</i>          | 7e-63           |
| <i>c8074</i>  | <i>Myo7a/15/1a</i>   | 2e-148/3e-136/0 |
| <i>c13777</i> | <i>Myo6</i>          | 0               |

**TRE-SPECIFIC**

|               |                   |             |
|---------------|-------------------|-------------|
| <i>c11426</i> | <i>Ntrk1</i>      | 2e-55       |
| <i>c11895</i> | <i>Chrna9</i>     | 1e-92       |
| <i>c23606</i> | <i>Crym</i>       | 4e-109      |
| <i>c2513</i>  | <i>Whrn</i>       | 2e-22       |
| <i>c28439</i> | <i>Serpinb6a</i>  | 2e-70       |
| <i>c36224</i> | <i>Axin1</i>      | 9e-36       |
| <i>c4523</i>  | <i>Sox2</i>       | 5e-33       |
| <i>c4683</i>  | <i>Mkks</i>       | 3e-60       |
| <i>c5186</i>  | <i>Dnm1</i>       | 0           |
| <i>c6103</i>  | <i>Myh14</i>      | 0           |
| <i>c10567</i> | <i>Atp8b1</i>     | 1e-97       |
| <i>c10606</i> | <i>Jag2</i>       | 5e-70       |
| <i>c11252</i> | <i>Scn8a</i>      | 3e-137      |
| <i>c13113</i> | <i>Snai2</i>      | 1e-24       |
| <i>c14655</i> | <i>Myo3a</i>      | 0           |
| <i>c20437</i> | <i>Tecta</i>      | 1e-38       |
| <i>c35565</i> | <i>Hoxa1</i>      | 1e-20       |
| <i>c3629</i>  | <i>Ush2a</i>      | 2e-34       |
| <i>c7677</i>  | <i>Trpa1/Espn</i> | 8e-94/2e-26 |

Figure 3- source data 2
