# Supplementary material for: Characterization of cephalic and non-cephalic sensory cell types provides insight into joint photo- and mechanoreceptor evolution
Source: eLife journal article supplement (doi:10.7554/elife.66144), 2021-08-05
Supplement: supp [file elife_poa_e66144_Supplementary_file_1.docx]

| *Gene/ID* | EP score | TRE score | Category | Data/validation |
| --- | --- | --- | --- | --- |
| *r-opsin1/c8630* | **5x10-3** | **8x10-4** | common EP/TRE | Fig. 1E, ref. Backfisch et al., 2013 |
| *egfp/c13611* | **7x10-3** | **4x10-3** | common EP/TRE | Fig. 1F, ref. Backfisch et al., 2013 |
| *gq/c6424* | **0.018** | **0.010** | common EP/TRE | Fig. 1G, ref. Backfisch et al., 2013 |
| *ngbl/c10609* | **7x10-3** | **7x10-3** | common EP/TRE | Fig. 2 – figure supplement 1A, 2E-H, 3B-C |
| *tmdc/c2433* | **7x10-3** | **7x10-3** | common EP/TRE | Fig. 2 – figure supplement 1B, ref. Pende et al., 2020 |
| *f8a/c6996* | -0.12 | **0.019** | TRE-specific | Fig. 2 – figure supplement 1C, 2K-L, 3H-I |
| *dmd/c7924* | 0.70 | **0.019** | TRE-specific | Fig. 2 – figure supplement 1D, 2M-N, 3J-K |
| *trpA/c7677* | -0.45 | **0.038** | TRE-specific | Fig. 2 – figure supplement 1E, 2I-J, 3F-G, Fig. 3E |
| *rps9/c34148* | -0.99 | -0.64 | not enriched | Fig. 1 – figure supplement 1C |
| *cdc5l/c20710* | 0.61 | -0.39 | not enriched | Fig. 1 – figure supplement 1D |

**Supplementary file 1. Synopsis of validated genes identified in the transcriptome profiling.**
