# Supplementary material for: Characterization of cephalic and non-cephalic sensory cell types provides insight into joint photo- and mechanoreceptor evolution
Source: eLife. 2021 Aug 5;10:e66144. doi: 10.7554/eLife.66144 (PMC8367381; doi:10.7554/eLife.66144)
Supplement: Supplementary file 3. [file elife-66144-supp3.xlsx]

## Sheet: Tree Fig.3C
GenBank entries used for the phylogenetic tree in Fig. 3C
Protein	GenBank Accession	Accession Type	Notes
Mouse TRPC4	NP_001240611.1	Protein
Fruitfly TRP	NP_476768.1	Protein
Fruitfly TRPL	NP_476895.1	Protein
Platynereis TRPC	QWX94526.1	Protein
Oyster TRPC	XP_011434930.1	Protein
Mouse TRPV5	NP_001007573.1	Protein
Fruitfly Nanchung	NP_648696.2	Protein
Platynereis Nanchung	MZ747698	Nuceotide	Protein sequence used in the phylogenetic tree is displayed as feature in the provided GenBank Nucleotide entry
Oyster Nanchung	XP_011445421.1	Protein
Fruitfly Inactive	NP_572353.1	Protein
Platynereis Inactive	MZ747699	Nucleotide	Protein sequence used in the phylogenetic tree is displayed as feature in the provided GenBank Nucleotide entry
Oyster Inactive	XP_011431159.1	Protein
Mouse TRPA1	NP_808449.1	Protein
Fruitfly TRPA1	NP_648263.5	Protein
Oyster TRPA1LX3	XP_011413966.1	Protein
Oyster TRPA1L	XP_011420430.1	Protein
Platynereis TRPA	QWX94521.1	Protein
Fruitfly Pyrexia	NP_612015.1	Protein
Fruitfly Waterwitch	NP_731193.1	Protein

## Sheet: Tree Fig.4-figure supplement 1A
GenBank entries used for the phylogenetic tree in Fig. 4 - figure supplement 1A
Protein	GenBank Accession	Accession Type	Notes
Dm NompC	NP_523483.2	Protein
Pdu NompC	MZ647694	Nucleotide	Protein sequence used in the phylogenetic tree is displayed as feature in the provided GenBank Nucleotide entry
Dr NompC	AAP86445.1	Protein
Dm Trpl	NP_476895.1	Protein
Dm Trp	NP_476768.1	Protein
Mm TrpC4	NP_001240611.1	Protein
Cg TrpC	XP_011434930.1	Protein
Pdu TrpC	QWX94526.1	Protein
Dm Pyrexia	NP_612015.1	Protein
Dm Waterwitch	NP_731193.1	Protein
Pdu TrpA	QWX94521.1	Protein
Cg TrpA1L	XP_011420430.1	Protein
Mm TrpA1	NP_808449.1	Protein
Dm TrpA1	NP_648263.5	Protein
Cg TrpA1Lx3	XP_011413966.1	Protein
Mm TrpV5	NP_001007573.1	Protein
Dm Inactive	NP_572353.1	Protein
Cg Inactive	XP_011431159.1	Protein
Pdu Inactive	MZ747699	Nucleotide	Protein sequence used in the phylogenetic tree is displayed as feature in the provided GenBank Nucleotide entry
Dm Nanchung	NP_648696.2	Protein
Cg TrpV5	XP_011445421.1	Protein
Pdu Nanchung	MZ747698	Nucleotide	Protein sequence used in the phylogenetic tree is displayed as feature in the provided GenBank Nucleotide entry

## Sheet: Tree Fig.4-figure supplement 1B
GenBank entries used for the phylogenetic tree in Fig. 4 - figure supplement 1B
Protein	GenBank Accession	Accession Type	Notes
Os Piezo	XP_025881504.1	Protein
At Piezo	NP_182327.6	Protein
Aq Piezo	XP_019849310.1	Protein
Dm Piezo	AFB77909.1	Protein
Pdu Piezo	MZ647695	Nucleotide	Protein sequence used in the phylogenetic tree is displayed as feature in the provided GenBank Nucleotide entry
Xt Piezo1	XP_002933721.3	Protein
Mm Piezo1	ADN28064.1	Protein
Xt Piezo2	XP_012820813.2	Protein
Mm Piezo2	ADN28065.1	Protein

## Sheet: Tree Fig.4-figure supplement 2
GenBank entries used for the phylogenetic tree in Fig. 4 - figure supplement 2
Protein	GenBank Accession	Accession Type	Notes
Mm Nexn	BAE22818.1	Protein
Pdu Tmc123	MZ747700	Nucleotide	Protein sequence used in the phylogenetic tree is displayed as feature in the provided GenBank Nucleotide entry
Pdu Tmc56	MZ747701	Nucleotide	Protein sequence used in the phylogenetic tree is displayed as feature in the provided GenBank Nucleotide entry
Pdu Tmc487b	MZ747702	Nucleotide	Protein sequence used in the phylogenetic tree is displayed as feature in the provided GenBank Nucleotide entry
Pdu Tmc487c	MZ747703	Nucleotide	Protein sequence used in the phylogenetic tree is displayed as feature in the provided GenBank Nucleotide entry
Pdu Tmc487a	MZ747704	Nucleotide	Protein sequence used in the phylogenetic tree is displayed as feature in the provided GenBank Nucleotide entry
The rest of protein sequences are as published in Erives and Fritzsch, G3: Genes, Genomes, Genetics (2020), Vol. 10, p819, Fig.5 (https://doi.org/10.1534/g3.119.400951)

## Sheet: Tree Fig.6-figure supplement 1A
GenBank entries used for the phylogenetic tree in Fig. 6 - figure supplement 1A
Protein	GenBank Accession	Accession Type	Notes
Pdu Atp2al	MZ747705	Nucleotide	Protein sequence used in the phylogenetic tree is displayed as feature in the provided GenBank Nucleotide entry
Mm Atp2a3	NP_058025.2	Protein
Aq Serca	XP_019850897.1	Protein
Nv Serca	XP_001639528.1	Protein
Ce Mca4	NP_499386.1	Protein
Pdu Atp2a	MZ747706	Nucleotide	Protein sequence used in the phylogenetic tree is displayed as feature in the provided GenBank Nucleotide entry
Dm Serca	NP_726381.1	Protein
Aq Atp2c1l	XP_019849959.1	Protein
Nv Atp2c1	XP_032231409.1	Protein
Ce Pmr1	NP_001021862.1	Protein
Dm Spock	NP_730744.1	Protein
Mm Atp2c1a	AAH43091.1	Protein
Dr Atp2c1	XP_003200287.2	Protein
Aq Atp2b	XP_019863584.1	Protein
Nv Atp2b	XP_032238958.1	Protein
Dm Pmca	NP_001014688.3	Protein
Pdu Atp2b	QWX94542.1	Protein
Ce Mca3	NP_001370848.1	Protein
Ce Mca1	NP_501709.2	Protein
Ce Mca2	CAA09308.1	Protein
Mm Atp2b4	XP_011246340.1	Protein
Dr Atp2b4	ACB45514.1	Protein
Mm Atp2b1	NP_001346435.1	Protein
Dr Atp2b1b	NP_001129103.1	Protein
Dr Atp2b1a	NP_001038222.1	Protein
Mm Atp2b2	XP_030110982.1	Protein
Dr Atp2b2	NP_001116710.1	Protein
Mm Atp2b3	XP_006528144.1	Protein
Dr Atp2b3b	NP_001121714.1	Protein
Dr Atp2b3a	NP_001352362.1	Protein
